# Supplementary material for: Assessment of Language and Indexing Biases Among Chinese-Sponsored Randomized Clinical Trials
Source: PubMed Central journal article supplement (PMC7256669; doi:10.1001/jamanetworkopen.2020.5894), 2020-05-28
Supplement: jamanetwopen-3-e205894-s001.pdf [file jamanetwopen-3-e205894-s001.pdf]

## Supplementary Online Content

Jia Y, Huang D, Wen J, et al. Assessment of language and indexing biases among Chinese-sponsored randomized clinical trials. *JAMA Netw Open*. 2020;3(5):e205894.  
doi:10.1001/jamanetworkopen.2020.5894

**eTable 1.** Search Strategies

**eTable 2.** Search Terms

**eTable 3.** Method to Match Journal Articles With Registry Records

**eTable 4.** Characteristics of Published CS-RCTs by Language of Journal Articles

**eTable 5.** Characteristics of Published CS-RCTs by Language of Bibliographic Databases

This supplementary material has been provided by the authors to give readers additional information about their work.

eTable 1. Search Strategies

|            |                                        |                                                                         |
|------------|----------------------------------------|-------------------------------------------------------------------------|
| Strategy 1 | Single-Center and Multi-Center CS-RCTs | Registration Number                                                     |
| Strategy 2 | Single-Center and Multi-Center CS-RCTs | PI's Name AND PI's Affiliation AND (Disease OR Drug) AND Study End Date |
| Strategy 3 | Multi-Center CS-RCTs                   | Recruitment Facilities AND Disease AND Drug AND Study End Date          |

PI: Principle Investigator; CS-RCT: Chinese-Sponsored Randomized Controlled Trials.

eTable 2. Search Terms

| Database | Identifier | Source of Subjects     | Source of Keywords                                                                                           |
|----------|------------|------------------------|--------------------------------------------------------------------------------------------------------------|
| English  | Disease    | MeSH<br>Emtree         | Registry records<br>PubMed entry terms<br>Embase synonyms                                                    |
|          | Drug       | MeSH<br>Emtree         | Registry records<br>PubMed entry terms<br>Embase synonyms                                                    |
| Chinese  | Disease    | MeSH (Chinese version) | Registry records<br>ICD-10 (Chinese version)<br>ICD-9 (Chinese version)<br>Three doctors from PUMC           |
|          | Drug       | MeSH (Chinese version) | Registry records<br>China FDA website for drug trade names and compound names<br>Three pharmacists from PUMC |

MeSH: Medical Subject Headings; Emtree: Embase Subject Headings; ICD-9: The International Classification of Diseases, Ninth Revision; ICD-10: The International Classification of Diseases, Tenth Revision; PUMC: Peking Union Medical College; China FDA: China Food and Drug Administration

eTable 3. Method to Match Journal Articles With Registry Records

| Category                                                                                    | English Articles |       | Chinese Articles |       | Total |       |
|---------------------------------------------------------------------------------------------|------------------|-------|------------------|-------|-------|-------|
|                                                                                             | No.              | %     | No.              | %     | No.   | %     |
| Confirmed Matches                                                                           |                  |       |                  |       |       |       |
| Similar Eligibility Criteria & Interventions, Same Registration Number                      | 311              | 84.5  | 20               | 19.6  | 331   | 70.4  |
| Similar Eligibility Criteria & Interventions, Same Ethics Committee Approval Number         | 1                | 0.3   | 8                | 7.8   | 9     | 1.9   |
| Similar Eligibility Criteria & Interventions, Same Funding Identification                   | 2                | 0.5   | 1                | 1.0   | 3     | 0.6   |
| Consistent Eligible Criteria & Interventions, Similar Sample Size & Overlapped Study Period | 38               | 10.3  | 40               | 39.2  | 78    | 16.6  |
| Consistent Eligible Criteria & Interventions, Identical Sample Size                         | 7                | 1.9   | 3                | 2.9   | 10    | 2.1   |
| Consistent Eligible Criteria & Interventions, Identical Study Period                        | 1                | 0.3   | 0                | 0.0   | 1     | 0.2   |
| Total                                                                                       | 360              | 97.8  | 72               | 70.6  | 432   | 91.9  |
| Probable Matches                                                                            |                  |       |                  |       |       |       |
| Consistent Eligibility Criteria & Interventions Similar Sample Size                         | 7                | 1.9   | 16               | 15.7  | 23    | 4.9   |
| Consistent Eligibility Criteria & Interventions Overlapped Study Period                     | 1                | 0.3   | 14               | 13.7  | 15    | 3.2   |
| Total                                                                                       | 8                | 2.2   | 30               | 27.4  | 38    | 8.1   |
| Total                                                                                       | 368              | 100.0 | 102              | 100.0 | 470   | 100.0 |

eTable 4. Characteristics of Published CS-RCTs by Language of Journal Articles

| Category                       | English Articles |  |       | Chinese Articles |  |       | Total |  |       |
|--------------------------------|------------------|--|-------|------------------|--|-------|-------|--|-------|
|                                | No.              |  | %     | No.              |  | %     | No.   |  | %     |
| Positivity                     |                  |  |       |                  |  |       |       |  |       |
| Positive                       | 276              |  | 75.41 | 47               |  | 46.1  | 323   |  | 69.0  |
| Negative                       | 90               |  | 24.59 | 55               |  | 53.9  | 145   |  | 31.0  |
| Sample Size                    |                  |  |       |                  |  |       |       |  |       |
| >=100                          | 230              |  | 62.5  | 56               |  | 54.9  | 286   |  | 60.9  |
| <100                           | 138              |  | 37.5  | 46               |  | 45.1  | 184   |  | 39.1  |
| Number of Centers              |                  |  |       |                  |  |       |       |  |       |
| Multi-center                   | 108              |  | 29.35 | 40               |  | 39.2  | 148   |  | 31.5  |
| Single-center                  | 260              |  | 70.65 | 62               |  | 60.8  | 322   |  | 69.5  |
| Funding                        |                  |  |       |                  |  |       |       |  |       |
| Industry                       | 63               |  | 17.12 | 30               |  | 29.4  | 93    |  | 19.8  |
| Non-Industry                   | 305              |  | 82.88 | 72               |  | 70.6  | 377   |  | 80.2  |
| Registration Type              |                  |  |       |                  |  |       |       |  |       |
| Prospective                    | 115              |  | 31.25 | 40               |  | 39.2  | 155   |  | 33.0  |
| Retrospective                  | 253              |  | 68.75 | 62               |  | 60.8  | 315   |  | 67.0  |
| Design                         |                  |  |       |                  |  |       |       |  |       |
| Superiority                    | 346              |  | 94.54 | 96               |  | 94.1  | 442   |  | 94.4  |
| Equivalence or Non-inferiority | 20               |  | 5.46  | 6                |  | 5.9   | 26    |  | 5.6   |
| Total                          | 368              |  | 100.0 | 102              |  | 100.0 | 470   |  | 100.0 |

Abbreviations

CS-RCTs: Chinese-Sponsored Randomized Controlled Trials.

eTable 5. Characteristics of Published CS-RCTs by Language of Bibliographic Databases

| Category                       | English Databases |  |       | Chinese Databases |  |       | Total |  |       |
|--------------------------------|-------------------|--|-------|-------------------|--|-------|-------|--|-------|
|                                | No.               |  | %     | No.               |  | %     | No.   |  | %     |
| Positivity                     |                   |  |       |                   |  |       |       |  |       |
| Positive                       | 285               |  | 72.5  | 38                |  | 50.7  | 323   |  | 69.0  |
| Negative                       | 108               |  | 27.5  | 37                |  | 49.3  | 145   |  | 31.0  |
| Sample Size                    |                   |  |       |                   |  |       |       |  |       |
| <100                           | 147               |  | 37.2  | 37                |  | 49.3  | 184   |  | 39.2  |
| >=100                          | 248               |  | 62.8  | 38                |  | 50.7  | 286   |  | 60.8  |
| Number of Centers              |                   |  |       |                   |  |       |       |  |       |
| Multi-center                   | 123               |  | 31.1  | 25                |  | 33.3  | 148   |  | 31.5  |
| Single-center                  | 272               |  | 68.9  | 50                |  | 66.7  | 322   |  | 68.5  |
| Funding                        |                   |  |       |                   |  |       |       |  |       |
| Industry                       | 76                |  | 19.2  | 17                |  | 22.7  | 93    |  | 19.8  |
| Non-Industry                   | 319               |  | 80.8  | 58                |  | 77.3  | 377   |  | 80.2  |
| Registration Type              |                   |  |       |                   |  |       |       |  |       |
| Prospective                    | 125               |  | 31.7  | 30                |  | 40.0  | 155   |  | 33.0  |
| Retrospective                  | 270               |  | 68.3  | 45                |  | 60.0  | 315   |  | 67.0  |
| Design                         |                   |  |       |                   |  |       |       |  |       |
| Superiority                    | 371               |  | 94.4  | 71                |  | 94.7  | 442   |  | 94.4  |
| Equivalence or Non-inferiority | 22                |  | 5.6   | 4                 |  | 5.3   | 26    |  | 5.6   |
| Total                          | 395               |  | 100.0 | 75                |  | 100.0 | 470   |  | 100.0 |

Abbreviations

CS-RCTs: Chinese-Sponsored Randomized Controlled Trials.
